# Supplementary material
Source: Springer Nature journal article supplement (https://www.springermedizin.de/resource/supplementary/12904_2012_145_MOESM1_ESM.pdf/9517708)
Supplement: MOESM1 [file 9517708]

Articles identified through  
key search of databases

(n=90)

Articles identified through  
supplementary search

(n=272)

Total number of articles considered from database and  
supplementary search

(n= 362)

255 discarded on  
basis of title or  
abstract

74 excluded from full review  
68 not specific to aims of review  
4 not original outcomes of  
research  
2 unable to obtain full article

33 Studies included in literature review
